# Supplementary material
Source: Springer Nature journal article supplement (https://www.springermedizin.de/resource/supplementary/12958_2013_1183_MOESM2_ESM.pdf/9566942)

■ r-FSH + r-LH    □ HP-hMG + u-FSH

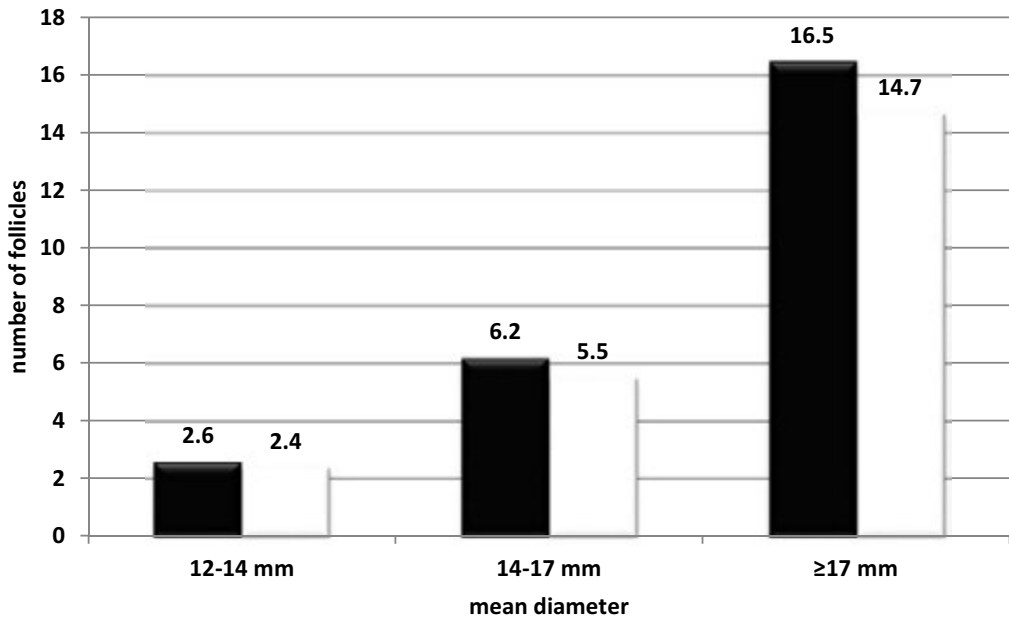

Supplement: MOESM2 [file 9566942]
